# Supplementary material for: Measurement properties of the minimal disease activity criteria for psoriatic arthritis
Source: PubMed Central journal article supplement — RMD Open. 2019 Sep 6;5(2):e001002. doi: 10.1136/rmdopen-2019-001002 (PMC6744081; doi:10.1136/rmdopen-2019-001002), 2019-09-06
Supplement: rmdopen-2019-001002supp001.pdf [file rmdopen-2019-001002supp001.pdf]

## Measurement properties of MDA criteria

Supplementary Table S1: Summary of study characteristics

| Author (Year)                           | Study Years  | Study Type                             | Experimental Treatment | Country    | Sample Size   | Gender (n, % male)           | Mean Duration of PsA, Years (SD) | Mean Age, Years (SD)            |
|-----------------------------------------|--------------|----------------------------------------|------------------------|------------|---------------|------------------------------|----------------------------------|---------------------------------|
| Coates et al. (2010) <sup>26</sup>      | 2003 to 2007 | Prospective longitudinal observational | N/A                    | Canada     | MDA = 116     | MDA = 76 (66%)               | MDA = 6.6                        | MDA = 40                        |
|                                         |              |                                        |                        |            | non-MDA = 228 | non-MDA = 128 (56%)          | non-MDA = 6.8                    | Non-MDA = 44                    |
| Coates & Helliwell (2010) <sup>22</sup> | —            | Post-hoc analysis of RCT, placebo      | Infliximab             | UK         | 220           | —                            | —                                | —                               |
| Coates & Helliwell (2016) <sup>32</sup> | —            | Prospective longitudinal observational | N/A                    | World wide | 503           | 286 (57%)                    | 8.9                              | 50.8                            |
| Coates et al. (2016a) <sup>30</sup>     | —            | RCT, placebo                           | Secukinumab            | World wide | 397           | NR                           | NR                               | NR                              |
| Geijer et al. (2015) <sup>27</sup>      | —            | Prospective longitudinal observational | N/A                    | Sweden     | 72            | 29 (40%)                     | 1*                               | 47.8 (14.7)                     |
| Gladman et al. (2017) <sup>40</sup>     | 2013 to 2016 | RCT, placebo                           | Tofacitinib            | World wide | 394           | Tofacitinib 5 mg = 67 (51%)  | Tofacitinib 5 mg = 9.6 (7.6)     | Tofacitinib 5 mg = 49.5 (12.3)  |
|                                         |              |                                        |                        |            |               | Tofacitinib 10 mg = 58 (44%) | Tofacitinib 10 mg = 9.1 (6.8)    | Tofacitinib 10 mg = 51.3 (10.9) |
|                                         |              |                                        |                        |            |               | Placebo = 51 (39%)           | Placebo = 9.4 (8.1)              | Placebo = 49.0 (12.6)           |
| Kavanaugh et al. (2016) <sup>28</sup>   | —            | Post-hoc Analysis of RCT, placebo      | Golimumab              | USA        | 395           | —                            | —                                | —                               |
| Lubrano et al. (2015) <sup>34</sup>     | 2012 to 2015 | Prospective longitudinal observational | N/A                    | Italy      | 124           | 58 (47%)                     | 7                                | 52                              |

## Measurement properties of MDA criteria

| Author (Year)                       | Study Years  | Study Type                                                              | Experimental Treatment | Country    | Sample Size                                                                  | Gender (n, % male)              | Mean Duration of PsA, Years (SD)      | Mean Age, Years (SD)                    |
|-------------------------------------|--------------|-------------------------------------------------------------------------|------------------------|------------|------------------------------------------------------------------------------|---------------------------------|---------------------------------------|-----------------------------------------|
| Lubrano et al. (2017) <sup>35</sup> | 2016         | Cross-sectional analysis of longitudinal observational study            | N/A                    | Italy      | 109                                                                          | bDmARD = 41 (52%)               | bDmARD = 7.8 (9.3)                    | bDmARD = 52.7 (12.4)                    |
|                                     |              |                                                                         |                        |            |                                                                              | csDMARD = 14 (47%)              | csDMARD = 6.6 (8.2)                   | csDMARD = 51.6 (12.3)                   |
| Mease et al. (2013) <sup>46</sup>   | —            | Post-hoc analysis of RCT, placebo                                       | Adalimumab             | USA        | 313                                                                          | Placebo = 39 (57%)              | Placebo = NR                          | Placebo = 48 (12)                       |
|                                     |              |                                                                         |                        |            |                                                                              | Adalimumab = 38 (57%)           | Adalimumab = NR                       | Adalimumab = 50 (14)                    |
| Mease et al. (2014) <sup>41</sup>   | 2010 to 2011 | RCT, placebo                                                            | Certolizumab Pegol     | Global     | 409                                                                          | Placebo = 42%                   | Placebo = 7.9 (7.7)                   | Placebo = 47.3 (11.1)                   |
|                                     |              |                                                                         |                        |            |                                                                              | Certolizumab pegol 200 mg = 46% | Certolizumab pegol 200 mg = 9.6 (8.5) | Certolizumab pegol 200 mg = 48.2 (12.3) |
|                                     |              |                                                                         |                        |            |                                                                              | Certolizumab Pegol 400 mg = 46% | Certolizumab Pegol 400 mg = 8.1 (8.3) | Certolizumab Pegol 400 mg = 47.1 (10.8) |
| Mease et al. (2015) <sup>42</sup>   | 2010 to 2011 | Interim analysis of dose-blind and open-label extension of RCT, placebo | Certolizumab Pegol     | Country    | Results summarized only for n=273 randomized to active treatment at baseline | NR                              | NR                                    | NR                                      |
| Mease et al. (2017b) <sup>19</sup>  | 2013 to 2016 | RCT, placebo with open-label extension                                  | Abatacept              | World wide | 424                                                                          | Placebo = 99 (47%)              | Placebo = 8.8 (8.3)                   | Placebo = 49.8 (11.3)                   |
|                                     |              |                                                                         |                        |            |                                                                              | Abatacept = 92 (43%)            | Abatacept = 8.3 (8.1)                 | Abatacept = 51.0 (10.7)                 |

## Measurement properties of MDA criteria

| Author (Year)                        | Study Years  | Study Type                          | Experimental Treatment     | Country    | Sample Size                           | Gender (n, % male)            | Mean Duration of PsA, Years (SD) | Mean Age, Years (SD)             |
|--------------------------------------|--------------|-------------------------------------|----------------------------|------------|---------------------------------------|-------------------------------|----------------------------------|----------------------------------|
| Mease et al. (2017a) <sup>31</sup>   | 2003 to 2004 | Post-hoc analysis of a RCT, placebo | Adalimumab                 | NR         | 135<br>(subset of study participants) | NR                            | NR                               | NR                               |
| Mease et al. (2017c) <sup>43</sup>   | 2014 to 2015 | RCT, placebo                        | Tofacitinib and Adalimumab | World wide | 422                                   | Placebo = 49 (47%)            | Placebo = 6.4 (6.4)              | Placebo = 47.7 (12.3)            |
|                                      |              |                                     |                            |            |                                       | Tofacitinib 5 mg = 50 (47%)   | Tofacitinib 5 mg = 7.3 (8.2)     | Tofacitinib 5 mg = 49.4 (12.6)   |
|                                      |              |                                     |                            |            |                                       | Tofacitinib 10 mg = 42 (40%)  | Tofacitinib 10 mg = 5.4 (5.8)    | Tofacitinib 10 mg = 46.9 (12.4)  |
|                                      |              |                                     |                            |            |                                       | Adalimumab = 56 (53%)         | Adalimumab = 5.3 (5.3)           | Adalimumab = 47.4 (11.3)         |
| Nash et al. (2017) <sup>44</sup>     | 2015 to 2016 | RCT, placebo                        | Ixekizumab                 | World wide | 363                                   | Placebo = 56 (47%)            | Placebo = 9.2 (7.3)              | Placebo = 51.5 (10.4)            |
|                                      |              |                                     |                            |            |                                       | Ixekizumab 4 weeks = 63 (52%) | Ixekizumab 4 weeks = 11.0 (9.6)  | Ixekizumab 4 weeks = 52.6 (13.6) |
|                                      |              |                                     |                            |            |                                       | Ixekizumab 2 weeks = 50 (41%) | Ixekizumab 2 weeks = 9.9 (7.4)   | Ixekizumab 2 weeks = 51.7 (11.9) |
| Perrotta et al. (2016) <sup>36</sup> | 2012 to 2014 | Prospective long-term observational | N/A                        | Italy      | 75                                    | 35 (47%)                      | 6.5 (3-12)**                     | 52 (47-62)                       |
| Queiro et al. (2017) <sup>25</sup>   | 2014 to 2015 | Cross-sectional observational study | N/A                        | Spain      | 277                                   | MDA = 82 (62%)                | MDA = 9.8 (8.1)                  | MDA = 53.5 (13.3)                |
|                                      |              |                                     |                            |            |                                       | Non-MDA = 41 (44%)            | Non-MDA = 9.4 (7.3)              | Non-MDA = 52.8 (10.9)            |

## Measurement properties of MDA criteria

| Author (Year)                             | Study Years  | Study Type                                                                   | Experimental Treatment | Country | Sample Size                                | Gender (n, % male)                         | Mean Duration of PsA, Years (SD)              | Mean Age, Years (SD)                           |
|-------------------------------------------|--------------|------------------------------------------------------------------------------|------------------------|---------|--------------------------------------------|--------------------------------------------|-----------------------------------------------|------------------------------------------------|
| Rahman et al. (2017) <sup>33</sup>        | 2005 to 2010 | Prospective long-term observational study                                    | bDMARDs                | Canada  | 223                                        | 101 (45%)                                  | 5.4 (6.3)                                     | 49.8 (11.1)                                    |
| Van den Bosch et al. (2015) <sup>47</sup> | —            | Post-hoc analysis of prospective longitudinal clinical efficacy (open-label) | Adalimumab             | Unknown | Joint and skin remission <sup>†</sup> = 43 | Joint and skin remission = 26 (61%)        | Joint and skin remission = 10.2 (7.7)         | Joint and skin remission = 45.6 (10.8)         |
|                                           |              |                                                                              |                        |         | Joint remission only = 30                  | Joint remission only = 22 (73%)            | Joint remission only = 7.3 (7.0)              | Joint remission only = 39.4 (10.2)             |
|                                           |              |                                                                              |                        |         | Skin remission only = 101                  | Skin remission only = 53 (53%)             | Skin remission only = 11.2 (7.8)              | Skin remission only = 48.2 (11.3)              |
|                                           |              |                                                                              |                        |         | Neither skin nor joint remission = 94      | Neither skin nor joint remission: 59 (63%) | Neither skin nor joint remission = 11.8 (8.8) | Neither skin nor joint remission = 46.5 (10.7) |

Abbreviations: bMARD = biological disease-modifying antirheumatic drug; CRP = C-reactive protein; csDMARD = conventional synthetic disease-modifying antirheumatic drug; MDA = minimal disease activity; N/A = not applicable; NR = not reported; non-MDA = not achieving MDA; PGA = physician global assessment; PtGA = patient global assessment of disease activity; RCT = randomized controlled trial; SD = standard deviation; SJC = swollen joint count; TJC = tender joint count

\* Median

\*\* Median (25th to 75th percentile)

<sup>†</sup>Skin remission in this study was defined as clear or almost clear PGA; Joint remission was defined as SJC ≤1 and TJC ≤1 with assessments of the proportions of patients in 28-joint Disease Activity Score (DAS28) ≤2.6, MDA, or Boolean remission (TJC ≤1, SJC ≤1, CRP ≤1, PtGA ≤1).
